# Supplementary material
Source: publisher figshare collection journal article supplement (https://acs.figshare.com/ndownloader/files/8245373)
Supplement: Supplementary file 1 [file 8245373]

# **On the Molecular Origin of Photoluminescence of Nonblinking Carbon Dot**

Ananya Das, Venkatesh Gude, Debjit Roy, Tanmay Chatterjee, Chayan K. De, and Prasun K. Mandal\*

Department of Chemical Sciences, Indian Institute of Science Education and Research (IISER) Kolkata, Mohanpur, West-Bengal, 741246, India. e-mail: [prasunchem@iiserkol.ac.in](mailto:prasunchem@iiserkol.ac.in)

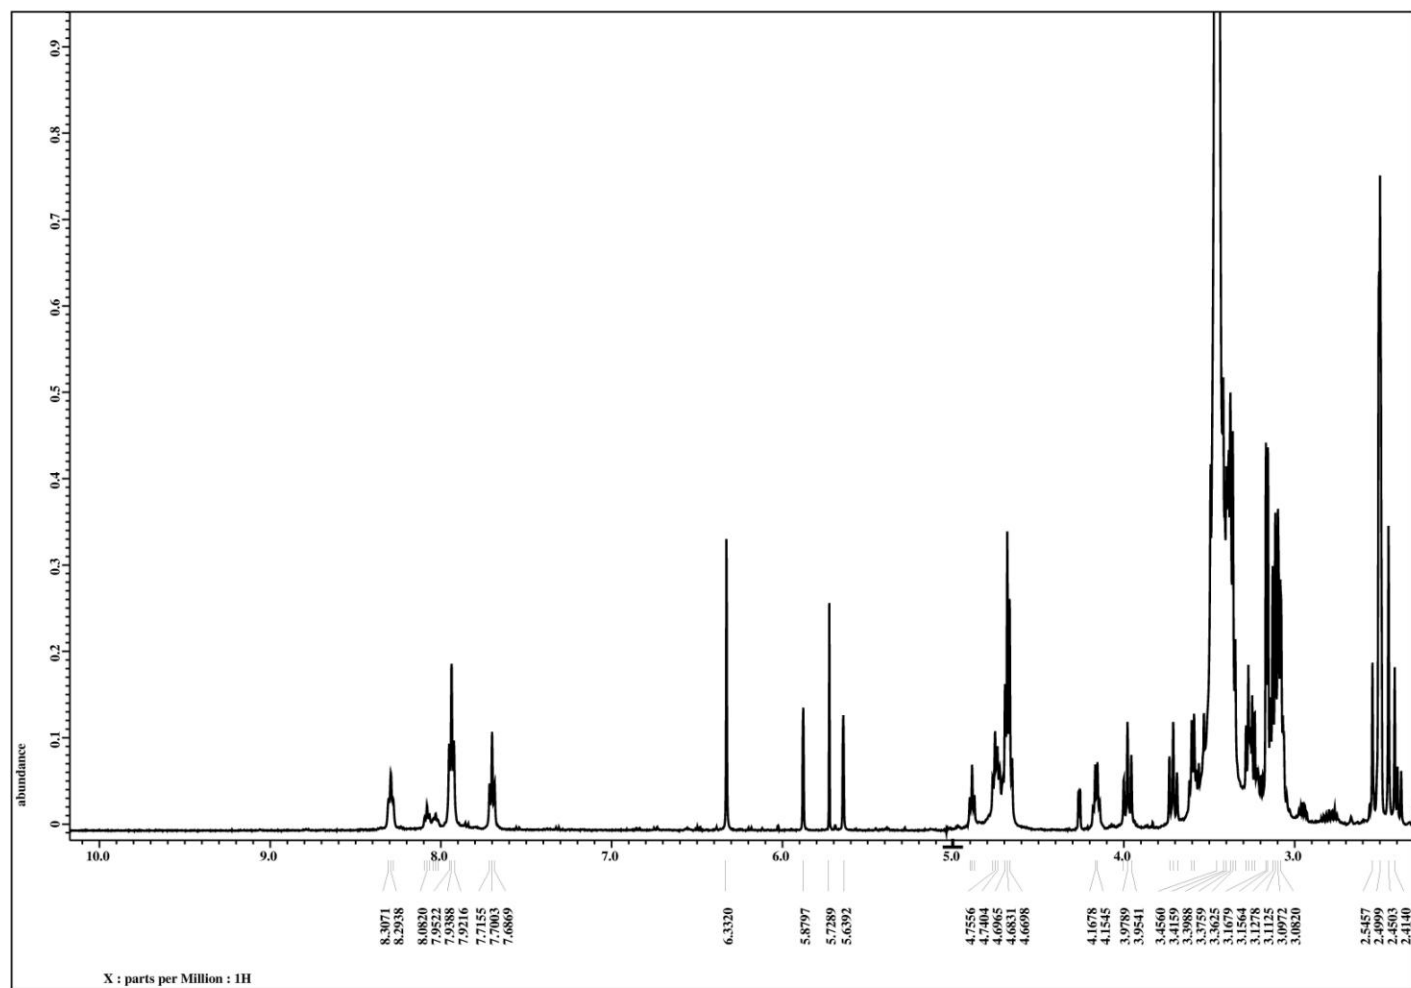

**Figure S1.**  $^1\text{H}$  NMR spectrum of CD in  $\text{DMSO-d}_6$ .

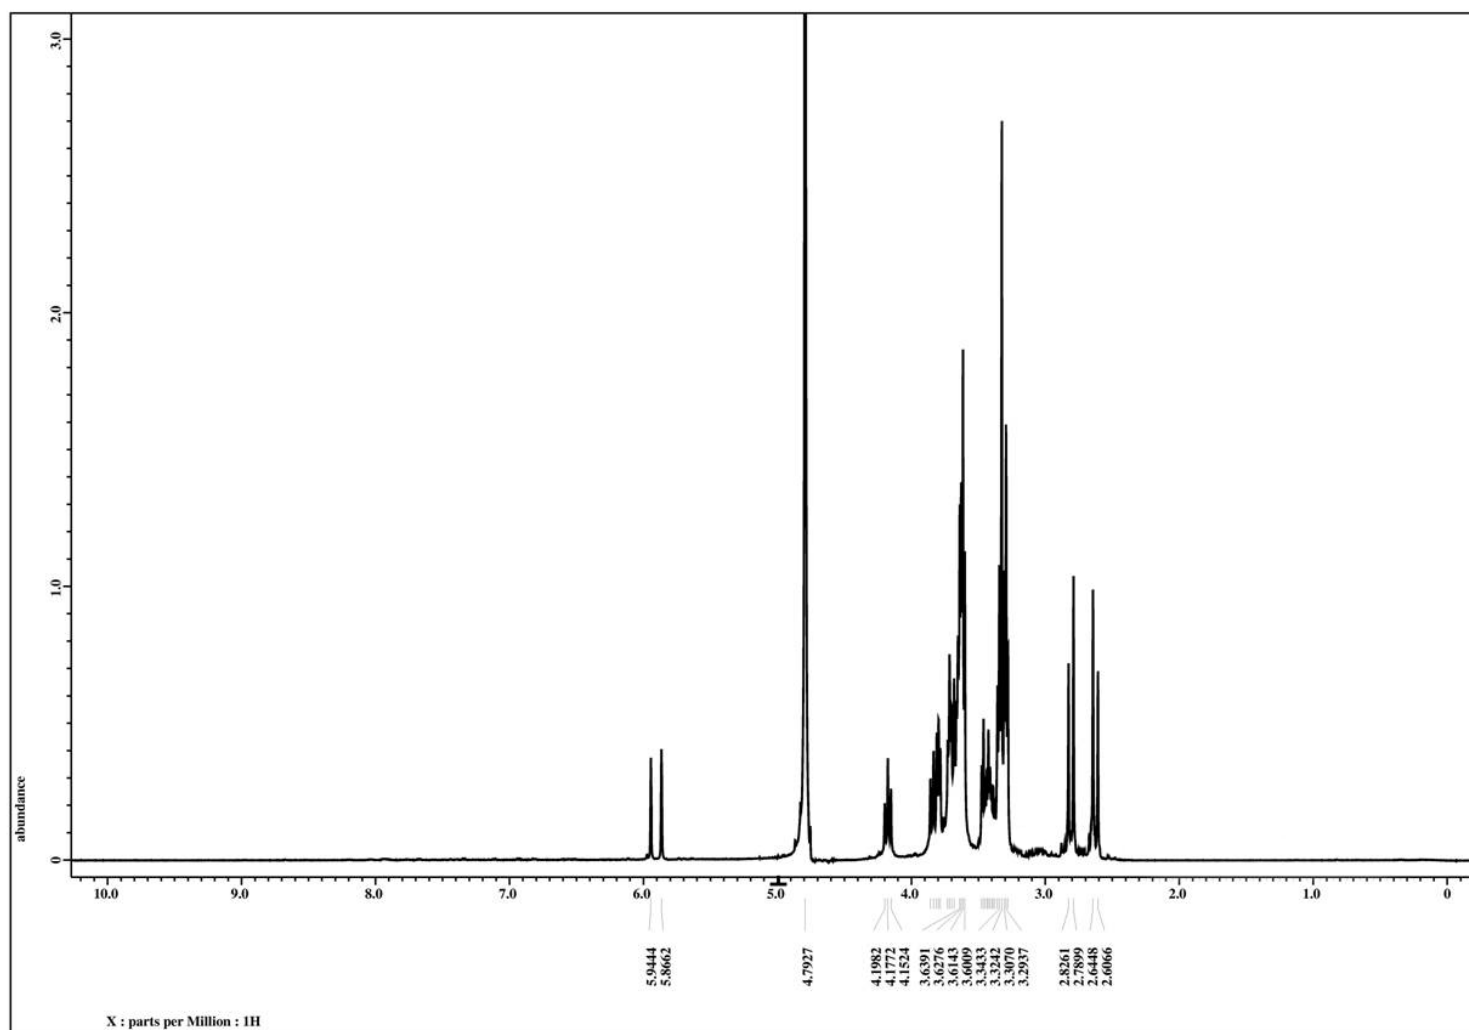

**Figure S2.**  $^1\text{H}$  NMR spectrum of CD in  $\text{D}_2\text{O}$ .

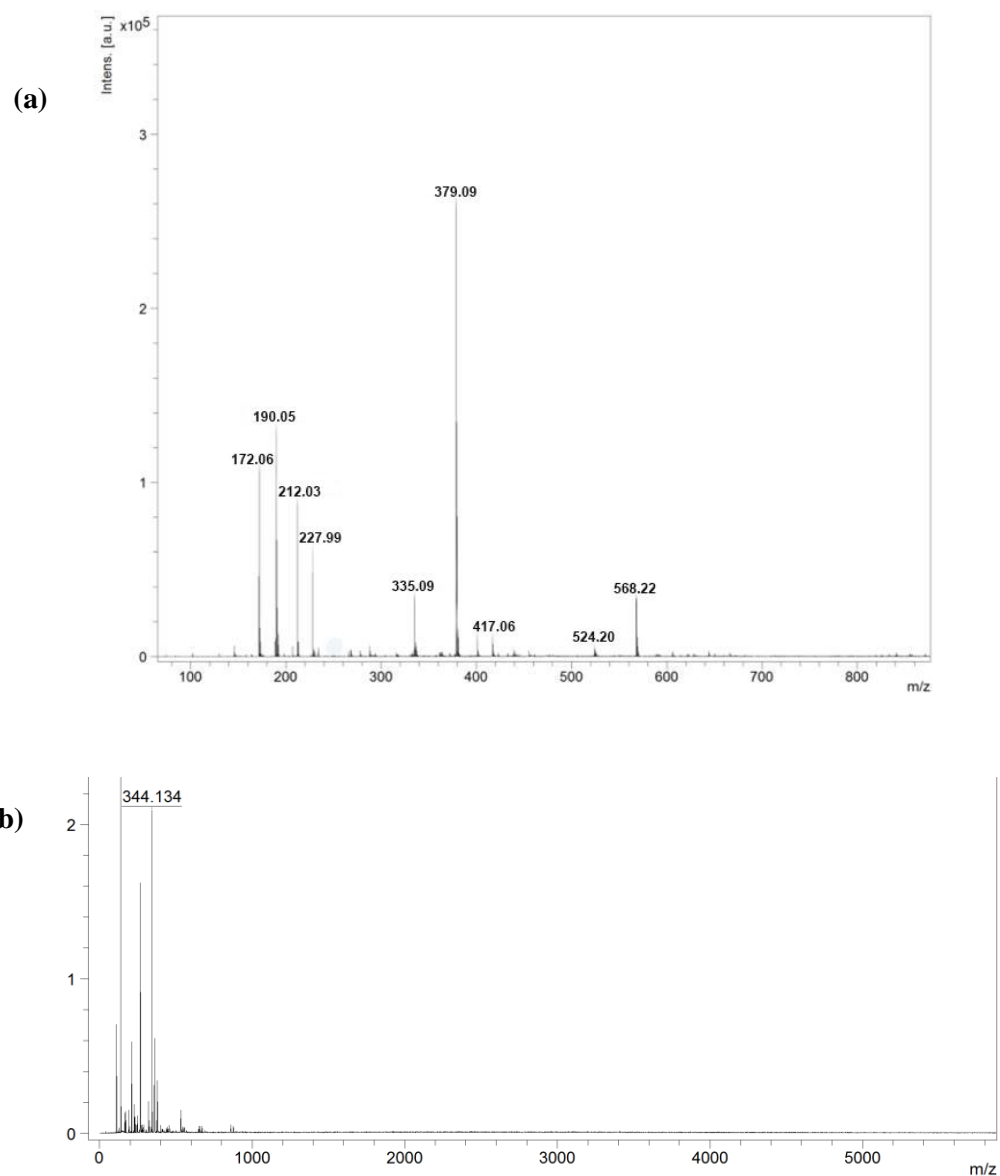

**Figure S3.** MALDI mass spectrum of CHCA Matrix (a), MALDI mass spectrum of CDs with CHCA matrix (b).

**Table S1. m/z values in MALDI mass**

|                      | m/z values                                                                                     |
|----------------------|------------------------------------------------------------------------------------------------|
| CHCA matrix          | 172.06, 190.05, 212.03, 227.99, 335.09, 379.09, 417.06, 524.20, 568.22                         |
| CDs with CHCA matrix | 172.06, 212.03, 227.99, <b>249.99, 268.11, 286.10, 322.16, 344.13, 360.11</b> , 379.09, 568.20 |

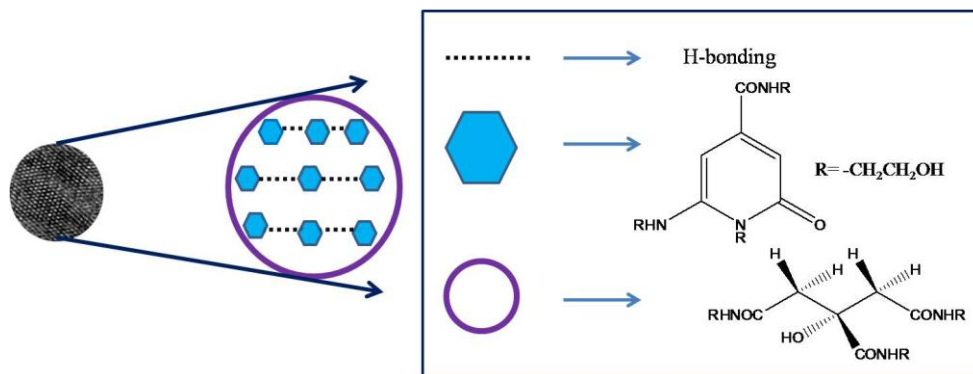

**Figure S4.** Formation of CD by stacking of fluorophores.

### AFM experimental details and image.

The morphology of carbon dot was investigated by atomic force microscopy. Atomic force microscopy was carried on NT-MDT (model no. AP-0100) in semicontact mode. The carbon dot was dissolved in methanol and drop casted on a microscopic glass coverslip.

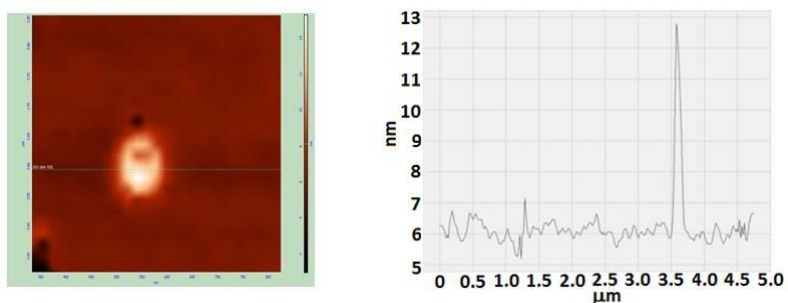

**Figure S5.** AFM image and its corresponding size of CD.

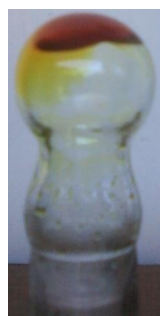

**Figure S6.** Inverted round-bottomed flask showing gel nature of CD.

## Computational calculation of 2-pyridone derivative.

The geometry of the molecule has been optimized by density function theory (DFT) using Gaussian 09 software [S1]. All the calculations were performed using B3LYP functional and 6-31G basis set for all the atoms. Default criteria for geometry optimization were used in each case.

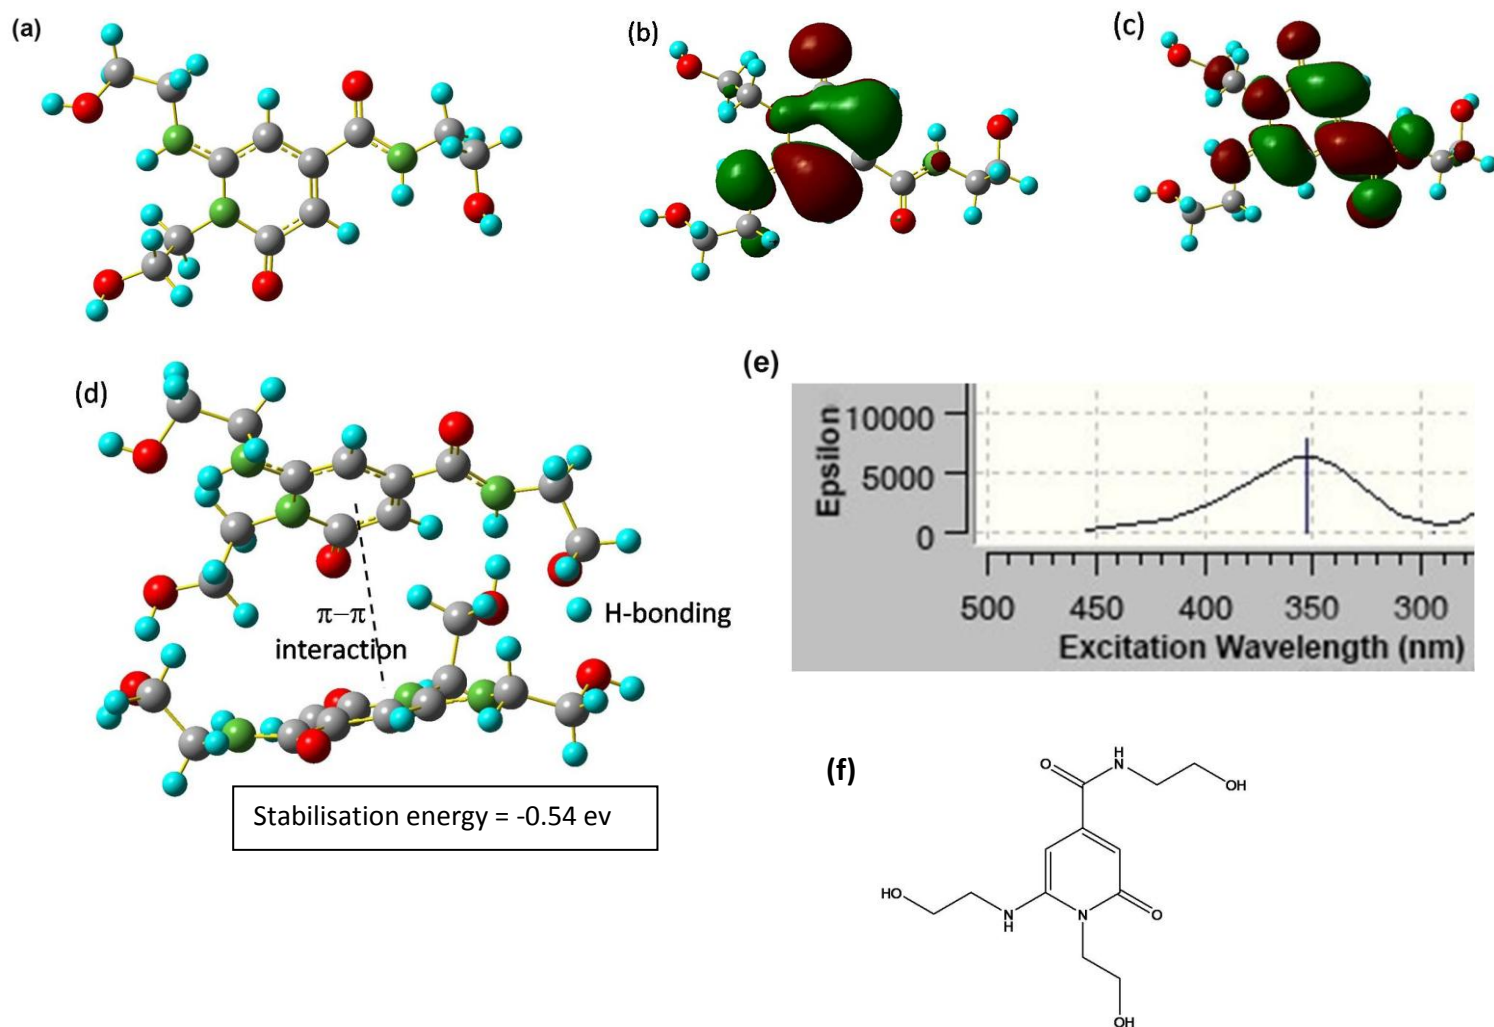

**Figure S7.** Geometry optimized structure (a), orbital picture of HOMO (b), LUMO (c) of 2-pyridone derivative. Stabilisation due to  $\pi$ - $\pi$  interaction and H-bonding (stabilisation energy = -0.54 eV) has been shown in between two 2-pyridone derivatives (d). Computational UV-VIS spectrum of 2-pyridone derivative (e). Structure of 2-pyridone derivatives (f).

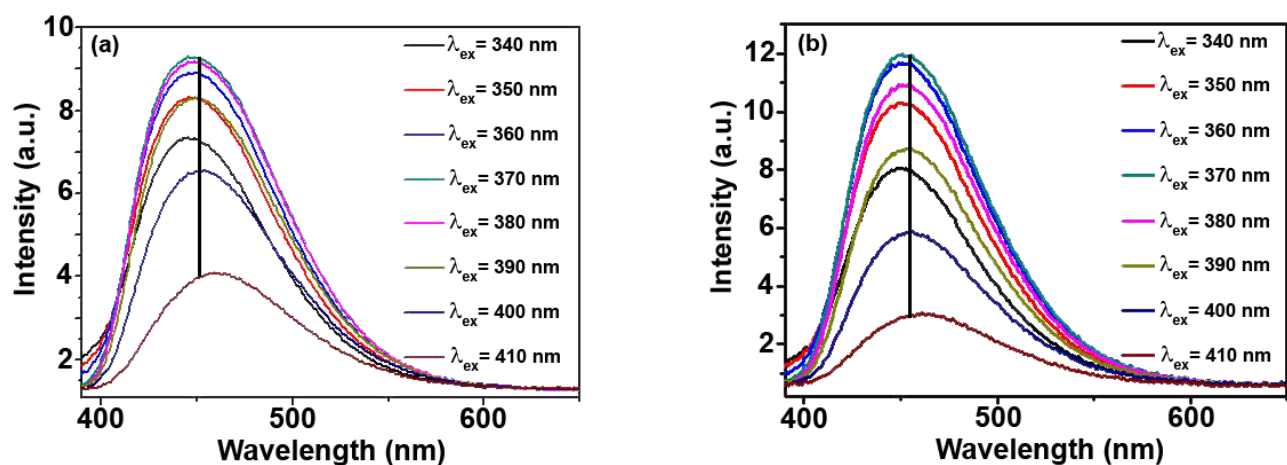

**Figure S8.** Emission behavior of CD in acetonitrile (a) and methanol (b).

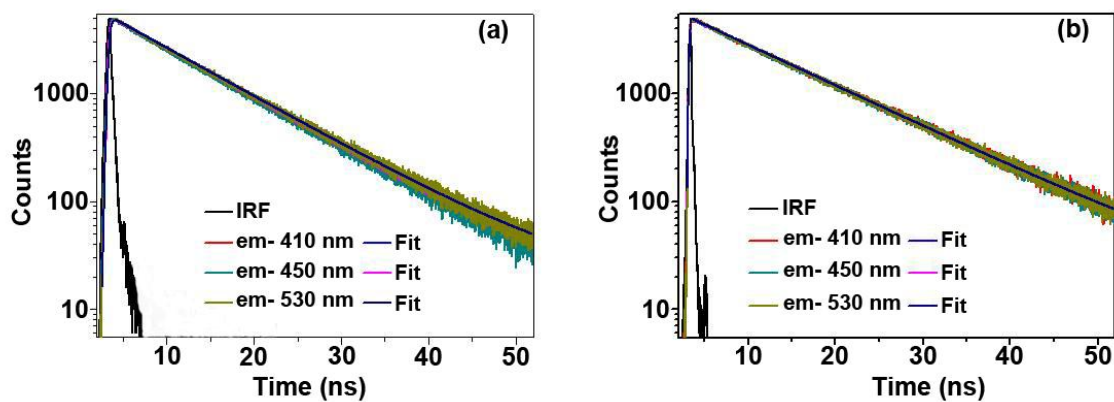

**Figure S9.** TCSPC decay of CD in acetonitrile (a) and methanol (b).

## Photostability experiment:

### Procedure for photostability measurement:

For photostability measurement 25 mL stock solutions of carbon dot (in water), CdSe QD (in toluene), and CdSe/CdS QD (in toluene) were kept in three different glass vials (volume = 30 mL) and put in a UV chamber. Absorbance of each solution of carbon dot, CdSe QD and CdSe/CdS QD were kept in between 0.18 to 0.20 at the irradiation wavelength (360 nm) (see figure below). Three stock solutions were continuously irradiated with two 360 nm 8 W each UV lamps. The distance between UV lamp and the top of each glass vial was 10 cm.

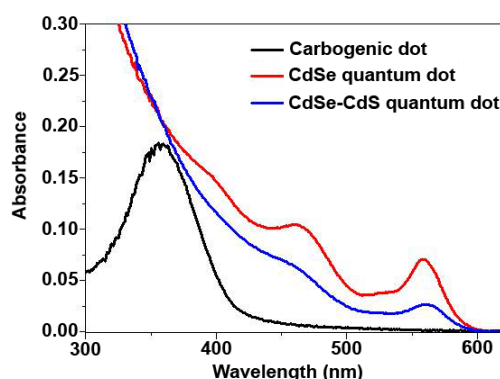

**Figure S10.** Absorption spectra of carbon dot, CdSe QD, and CdSe/CdS core-shell QD.

### Synthesis of QD.

CdSe core was synthesized following a literature procedure using ‘hot injection’ method [S2]. TOPO was used as a ligand. CdSe QDs were purified by centrifugation and decantation and then dispersed in toluene for further processing. CdSe/CdS core/shell QDs were prepared by SILAR (Successive Ion Layer Adhesion and Reaction) technique following a literature procedure [S3,S4]. Oleic acid was used as a ligand. Both the CdSe-core and CdSe/CdS core/shell QDs were synthesized in Schlenk line setup to maintain standard air free atmosphere. All chemicals required for the synthesis of QD were procured from Sigma-Aldrich.



### pH dependent experiment:

All the solutions (from pH 2 to pH 12) were prepared and checked by using a bench top pH meter (SESHIN, ECM-710). A fixed amount of CD was dissolved in all pH solutions ( $\sim 4 \mu\text{g}$  in 2.5 mL). Absorption spectra were recorded in Carry 300 Bio UV-VIS spectrophotometer.

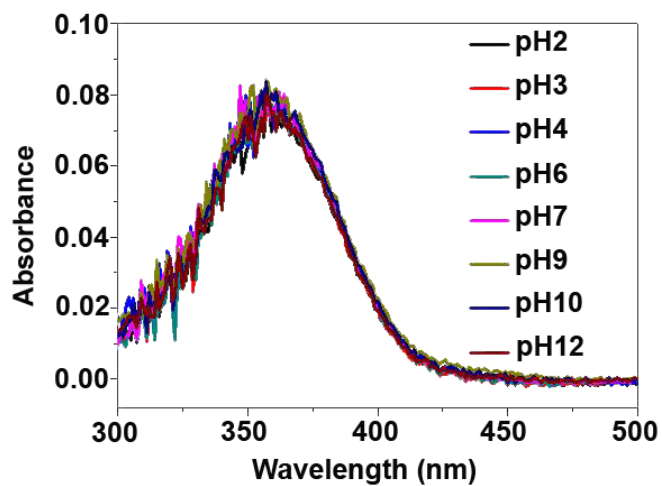

**Figure S11.** Absorption spectra of CD at different pH.

### Single particle movie:

A movie showing the gradual decrease of PL intensity of CD at the single particle level.

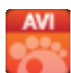

Movie\_Final.avi

## References

- [S1] Frisch, M. J.; Trucks, G. W.; Schlegel, H. B.; Scuseria, G. E.; Robb, M. A.; Cheeseman, J. R.; Scalmani, G.; Barone, V.; Mennucci, B.; Petersson, G. A., et al. Gaussian 09, Revision D.01; Gaussian, Inc., Wallingford, CT, 2009.
- [S2] Aldana, J.; Wang, Y. A.; Peng, X. G. Photochemical Instability of CdSe Nanocrystals Coated by Hydrophilic Thiols. *J. Am. Chem. Soc.* **2001**, *123*, 8844-8850.
- [S3] Li, J. J.; Wang, Y. A.; Guo, W. Z.; Keay, J. C.; Mishima, T. D.; Johnson, M. B.; Peng, X. G. Large-Scale Synthesis of Nearly Monodisperse CdSe/CdS Core/Shell Nanocrystals Using Air-Stable Reagents via Successive Ion Layer Adsorption and Reaction. *J. Am. Chem. Soc.* **2003**, *125*, 12567-12575.
- [S4] Xie, R.; Kolb, U.; Li, J.; Basche, T.; Mews, A. Synthesis and Characterization of Highly Luminescent CdSe-Core CdS/Zn<sub>0.5</sub>Cd<sub>0.5</sub>S/ZnS Multishell Nanocrystals. *J. Am. Chem. Soc.* **2005**, *127*, 7480-7488.
